# Supplementary material for: Blockchain Traceability Strategy for Retailers Oriented to Government Subsidy
Source: Research Square preprint supplement (doi:10.21203/rs.3.rs-8335826/v1), 2026-01-21
Supplement: Supplementary file 1 [file 51a9adab704fa8b2d44208bd.docx]

**Code and Parameters**

Table 2. Parameter definition

| *Parameters* | *Description* |
| --- | --- |
|  | *Product traceability level* |
|  | *Product traceability investment level coefficient* |
|  | *Production cost of products* |
|  | *Basic market demand* |
|  | *Retail price* |
|  | *Government subsidy* |
|  | *Competition level or retailers' product substitution level* |
|  | *Retailers' product quantities* |
|  | *Social welfare* |
|  | *Consumer surplus* |
|  | *Operational costs of product traceability for retailers* |
| () | *Stands for retailers that (do not) implement a product traceability strategy* |

. . .

**Profit Comparison**

**Social Welfare**
